# Supplementary material for: Involvement of prohibitins in an oncogenic protein complex in Chronic Lymphocytic Leukemia
Source: Research Square preprint supplement (doi:10.21203/rs.3.rs-3427671/v1), 2023-10-12
Supplement: Supplementary file 1 [file b7a2e29bfab08deebdbbb02a.pdf]

Supplementary data

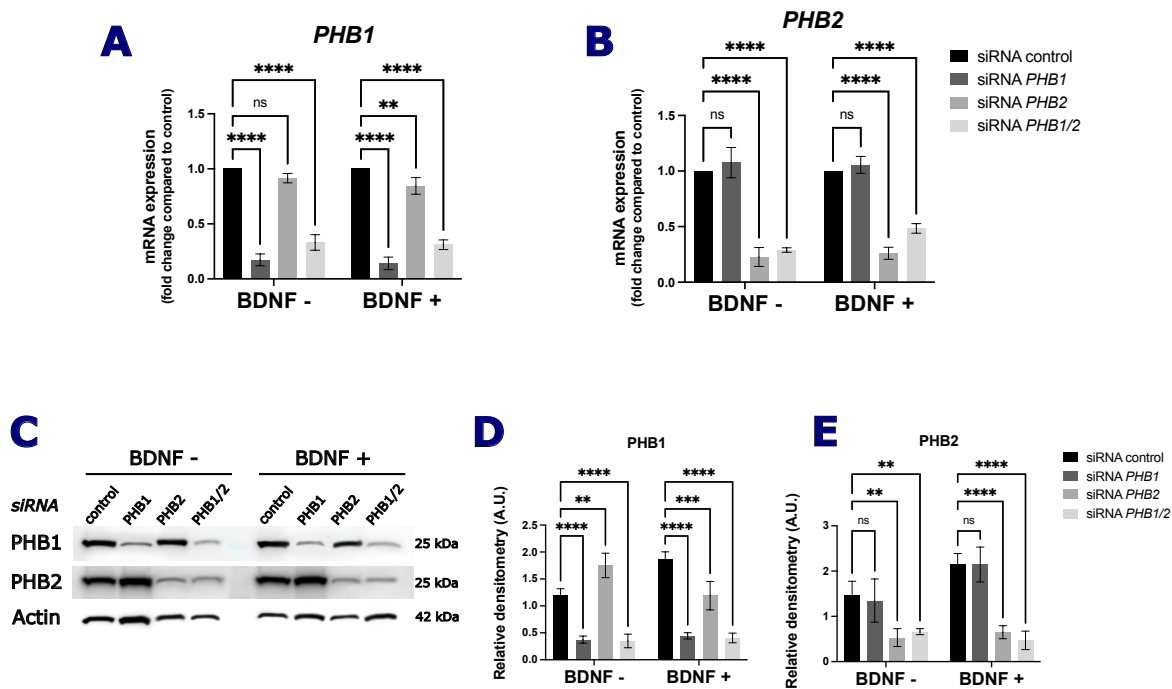

**Supplementary Figure 1:** Control of the effective inhibition of PHBs mRNA and protein levels following siRNA transfection. PHB1 (A) and PHB2 (B) mRNA expression levels were quantified following siRNA-mediated inhibition PHBs in MEC-1 cells. (C) The relative amount of PHBs proteins was evaluated by western blot analysis following siRNA transfection. (D) Densitometry analysis of the protein levels of PHB1. (E) Densitometry analysis of the protein levels of PHB2. All experiments were conducted in three independent replicates.

**Supplementary Table 1:** Characteristics of the patients whose B cells were used during the study.

| Patient ID number | Binet stage | cytogenetics | TP53                                | IGHV mutation      | Total pronostic |
|-------------------|-------------|--------------|-------------------------------------|--------------------|-----------------|
| 1                 | B           | adverse      | mutated and deleted (R181C ; R342*) | unmutated, adverse | adverse         |
| 2                 | A           | N/A          | N/A                                 | N/A                | N/A             |
| 3                 | C           | adverse      | mutated and deleted (C135Y)         | mutated, favorable | adverse         |
| 4                 | C           | adverse      | mutated (R273C ; G244D)             | unmutated, adverse | intermediate    |

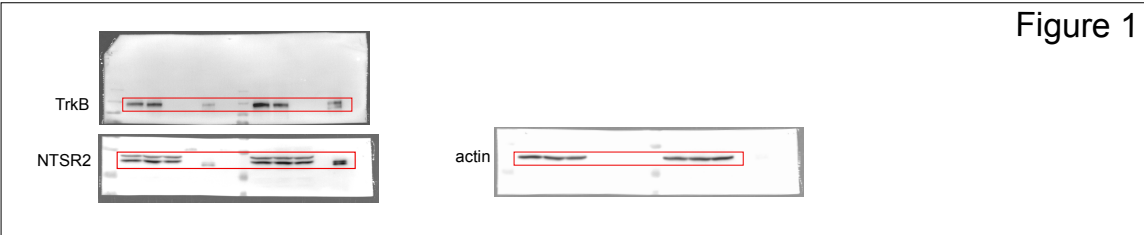

Figure 1

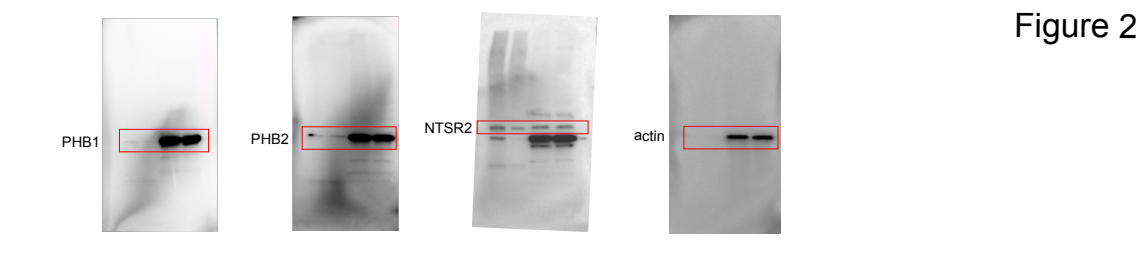

Figure 2

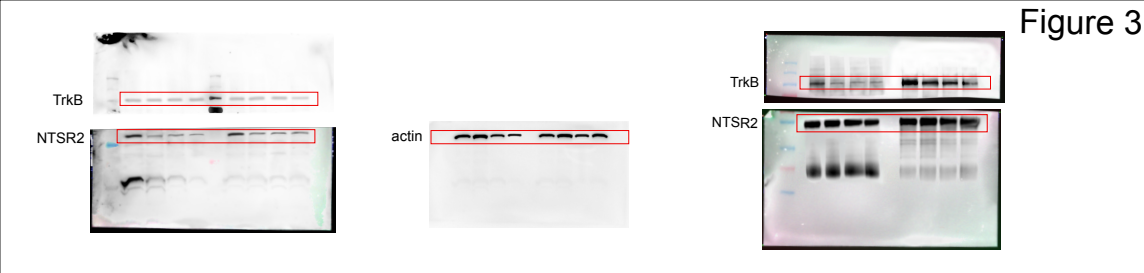

Figure 3

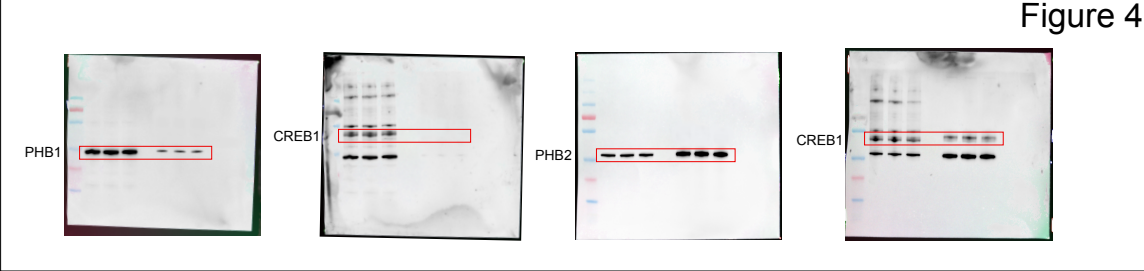

Figure 4

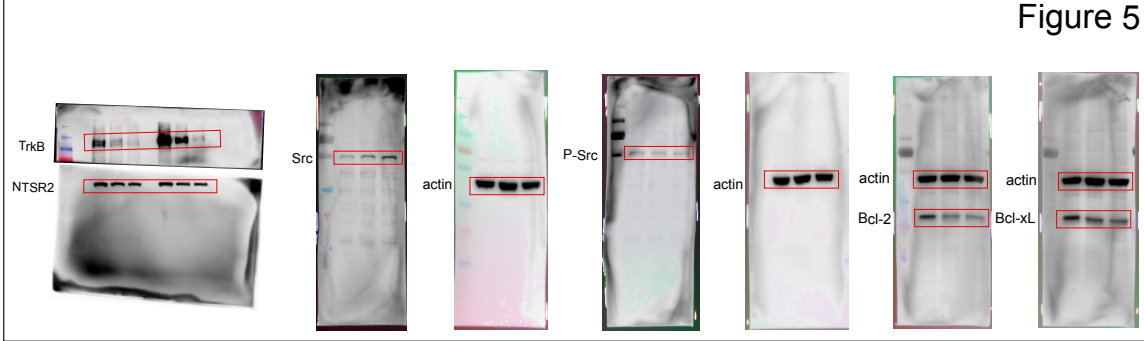

Figure 5

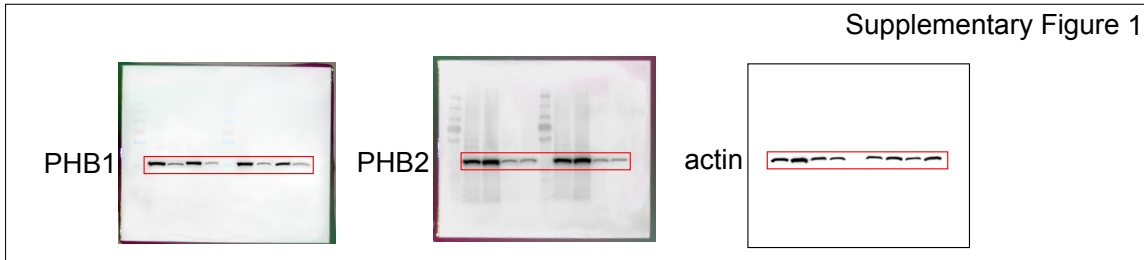

Supplementary Figure 1

**Supplementary Figure 2:** Whole membranes. The cropped versions that are presented in the article are framed in red.
